# Supplementary material
Source: PubMed Central journal article supplement (PMC9841064)
Supplement: NIHMS1823653-supplement-supinfo.pdf [file NIHMS1823653-supplement-supinfo.pdf]

**Supporting Information for “A Robust Approach for Electronic Health  
Record-Based Case-Control Studies with Contaminated Case Pools” by  
Guorong Dai, Yanyuan Ma, Jill Hasler, Jinbo Chen and Raymond J. Carroll**

**Guorong Dai<sup>1,\*</sup>, Yanyuan Ma<sup>2</sup>, Jill Hasler<sup>3</sup>, Jinbo Chen<sup>3</sup> and Raymond J. Carroll<sup>4</sup>**

<sup>1</sup>Department of Statistics and Data Science, School of Management, Fudan University, Shanghai 200433, China

<sup>2</sup>Department of Statistics, Pennsylvania State University, University Park, PA 16802, USA

<sup>3</sup>Department of Biostatistics, Epidemiology and Informatics, Perelman School of Medicine,  
University of Pennsylvania, Philadelphia, PA 19104, USA

<sup>4</sup>Department of Statistics, Texas A&M University, College Station, TX 77843, USA

\* *email*: guorongdai@fudan.edu.cn

**SUMMARY:** We collect in the following (i) all the technical details that cannot be accommodated in the main manuscript, including the regularity conditions, an auxiliary lemma and the proofs of all the theoretical results in Section 3, and (ii) some necessary supplements for the numerical studies in Sections 4–5

## Web Appendix A: Regularity Conditions

ASSUMPTION 1: The population-level equation  $\Phi(\mathbf{b}) = \mathbf{0}$  has a unique solution. The matrices  $\mathbf{A}_v$ ,  $\mathbf{A}_u$ ,  $\mathbf{A}_0$ ,  $\mathbf{B}_v$ ,  $\mathbf{B}_u$  and  $\mathbf{B}_0$  exist, while  $\mathbf{A}$  is invertible. The function  $\Psi_n(\cdot, \cdot)$  satisfies

$$\sup_{\mathbf{b} \in \mathcal{B}} \|n^{-1} \sum_{i=1}^N \Psi_n(\mathbf{W}_i, \mathbf{b}) - \Phi(\mathbf{b})\| = o_p(1). \quad (\text{S.1})$$

In addition, the partial derivative  $\Omega'_{n,j}(\mathbf{b}) \equiv \partial \Omega_n(\mathbf{b}) / \partial b_j$  is such that

$$\sup_{\mathbf{b} \in \mathcal{B}_0} \lambda_{\max}\{\Omega'_{n,j}(\mathbf{b})\} = O_p(n) \quad (j = 1, \dots, 2p), \quad (\text{S.2})$$

where  $\lambda_{\max}(\cdot)$  denotes the largest absolute eigenvalue of a matrix,  $\mathbf{b} \equiv (b_1, \dots, b_{2p})^T$  and  $\mathcal{B}_0$  is some open neighborhood of  $\beta$ .

Assumption 1 is quite standard for an estimator defined as the solution to an equation. In our setting, considering the fact that  $n^{-1} \sum_{i=1}^N E\{\Psi_n(\mathbf{W}_i, \mathbf{b})\} = \Phi(\mathbf{b})$  because of the case-control sampling, the high-level condition (S.1) of uniform convergence holds, for example, if the parameter space  $\mathcal{B}$  is compact; see Example 19.7 and the discussion after Theorem 5.9 in Van der Vaart (2000). The condition (S.2) is needed to control the residual in Taylor’s expansion of (16). In general, Assumption 1 imposes some fairly mild requirements to regulate the behavior of the estimating equation (16).

## Web Appendix B: An Auxiliary Lemma

LEMMA 1: For some fixed integer  $M > 0$ , suppose  $\mathbf{U}_{n,1}, \dots, \mathbf{U}_{n,M} \in \mathbb{R}^p$  are mutually independent sequences of random vectors satisfying that, for some  $p$ -dimensional vector  $\boldsymbol{\mu}_m$  and  $p \times p$  covariance matrix  $\boldsymbol{\Sigma}_m$ ,

$$\mathbf{U}_{n,m} \rightarrow \mathbf{N}(\boldsymbol{\mu}_m, \boldsymbol{\Sigma}_m) \quad (n \rightarrow \infty, m = 1, \dots, M) \quad (\text{S.3})$$

in distribution. Then  $\sum_{m=1}^M \mathbf{U}_{n,m} \rightarrow \mathbf{N}(\sum_{m=1}^M \boldsymbol{\mu}_m, \sum_{m=1}^M \boldsymbol{\Sigma}_m)$  in distribution as  $n \rightarrow \infty$ .

### Web Appendix C: Proof of Lemma 1

We have that, for any  $\mathbf{t} \in \mathbb{R}^p$ ,

$$\begin{aligned}
 E\{\exp(i\mathbf{t}^T \sum_{m=1}^M \mathbf{U}_{n,m})\} &= \prod_{m=1}^M E\{\exp(i\mathbf{t}^T \mathbf{U}_{n,m})\} \\
 &\rightarrow \prod_{m=1}^M \exp(i\boldsymbol{\mu}_m^T \mathbf{t} - \mathbf{t}^T \boldsymbol{\Sigma}_m \mathbf{t}/2) \\
 &= \exp\{i(\sum_{m=1}^M \boldsymbol{\mu}_m^T) \mathbf{t} - \mathbf{t}^T (\sum_{m=1}^M \boldsymbol{\Sigma}_m) \mathbf{t}/2\} \quad (\text{S.4})
 \end{aligned}$$

where  $i$  is the imaginary unit. In the above, the first step uses the mutual independence of  $\mathbf{U}_{n,1}, \dots, \mathbf{U}_{n,M}$ , while the second step is due to (S.3) and Levy's continuity theorem. The fact that (S.4) is the characteristic function of  $\mathbf{N}(\sum_{m=1}^M \boldsymbol{\mu}_m, \sum_{m=1}^M \boldsymbol{\Sigma}_m)$  implies the conclusion.

### Web Appendix D: Proof of Proposition 1

We have

$$\begin{aligned}
 \sum_{i=1}^N E[S_i \{g(\mathbf{X}_i) - D_i\} \mathbf{X}_i \bar{h}(\boldsymbol{\theta}^T \mathbf{X}_i)] &= \tau N E[\{g(\mathbf{X}) - D\} \mathbf{X} \bar{h}(\boldsymbol{\theta}^T \mathbf{X}) \mid S = 1] \\
 &= \eta^{-1} \tau N E[S \{g(\mathbf{X}) - D\} \mathbf{X} \bar{h}(\boldsymbol{\theta}^T \mathbf{X})] = \mathbf{0}, \quad (\text{S.5})
 \end{aligned}$$

where the first step is due to case-control sampling and the last step holds by the condition (12). It follows that

$$\begin{aligned}
 &\sum_{i=1}^N E\{S_i g(\mathbf{X}_i) \mathbf{X}_i \bar{h}(\boldsymbol{\theta}^T \mathbf{X}_i) - (1 - S_i) \mathbf{X}_i h(\boldsymbol{\theta}^T \mathbf{X}_i)\} \\
 &= \sum_{i=1}^N E\{S_i D_i \mathbf{X}_i \bar{h}(\boldsymbol{\theta}^T \mathbf{X}_i) - (1 - S_i) \mathbf{X}_i h(\boldsymbol{\theta}^T \mathbf{X}_i)\} \\
 &= N[\tau E\{D \mathbf{X} \bar{h}(\boldsymbol{\theta}^T \mathbf{X}) \mid S = 1\} - (1 - \tau) E\{\mathbf{X} h(\boldsymbol{\theta}^T \mathbf{X}) \mid S = 0\}] = \mathbf{0},
 \end{aligned}$$

where the second step is due to the case-control sampling and the last step is because of the definition (3) of  $\boldsymbol{\theta}$ . This verifies (13). Then (14) is from (S.5) and the fact that the validation set  $\{\mathbf{W}_i : R_i S_i = 1, i = 1, \dots, N\}$  can be viewed as a random sample drawn from the conditional distribution of  $(\mathbf{X}^T, D, S)^T$  given  $S = 1$ .

### Web Appendix E: Proof of Theorem 1

Write  $N_{\mathcal{U}} \equiv \sum_{i=1}^N (1 - R_i)S_i$ ,  $\mathcal{V} \equiv \{i : R_i S_i = 1, i = 1, \dots, N\}$ ,  $\mathcal{U} \equiv \{i : (1 - R_i)S_i = 1, i = 1, \dots, N\}$  and  $\mathcal{C} \equiv \{i : S_i = 0, i = 1, \dots, N\}$ . Due to case-control sampling and the fact that the validation set can be viewed as a random sample drawn from the candidate case pool, the sets  $\{\mathbf{W}_i : i \in \mathcal{V}\}$ ,  $\{\mathbf{W}_i : i \in \mathcal{U}\}$  and  $\{\mathbf{W}_i : i \in \mathcal{C}\}$  can actually be treated as mutually independent samples randomly selected from  $P(\mathbf{X}, D, S \mid S = 1)$ ,  $P(\mathbf{X}, S \mid S = 1)$  and  $P(\mathbf{X}, S \mid S = 0)$ , respectively. Here  $P(\cdot \mid S = s)$  refers to a conditional distribution given  $S = s$  ( $s \in \{0, 1\}$ ).

Denote  $\Psi'_n(\mathbf{W}, \mathbf{b}) \equiv \partial \Psi_n(\mathbf{W}, \mathbf{b}) / \partial \mathbf{b}$ . The law of large numbers, Slutsky’s Theorem and Assumption 1 give that, as  $n, N \rightarrow \infty$ ,

$$\begin{aligned}
& n^{-1} \sum_{i=1}^N \Psi'_n(\mathbf{W}_i, \boldsymbol{\beta}) \\
& \equiv n^{-1} \left\{ \sum_{i \in \mathcal{V}} \Psi'_n(\mathbf{W}_i, \boldsymbol{\beta}) + \sum_{i \in \mathcal{U}} \Psi'_n(\mathbf{W}_i, \boldsymbol{\beta}) + \sum_{i \in \mathcal{C}} \Psi'_n(\mathbf{W}_i, \boldsymbol{\beta}) \right\} \\
& = n^{-1} \sum_{i \in \mathcal{V}} \Psi'_n(\mathbf{W}_i, \boldsymbol{\beta}) + (\tau - \delta_{n,N}) N_{\mathcal{U}}^{-1} \sum_{i \in \mathcal{U}} \Psi'_n(\mathbf{W}_i, \boldsymbol{\beta}) + (1 - \tau) N_0^{-1} \sum_{i \in \mathcal{C}} \Psi'_n(\mathbf{W}_i, \boldsymbol{\beta}) \\
& \rightarrow \mathbf{A}_{\mathcal{V}} + (\tau - \delta) \mathbf{A}_{\mathcal{U}} + (1 - \tau) \mathbf{A}_0 = \mathbf{A}
\end{aligned} \tag{S.6}$$

in probability.

Then denote  $\zeta_{\mathcal{V}} \equiv E\{\Psi_{\mathcal{V}}(\mathbf{W}, \boldsymbol{\beta}) \mid S = 1\}$ ,  $\zeta_{\mathcal{U}} \equiv E\{\Psi_{\mathcal{U}}(\mathbf{W}, \boldsymbol{\beta}) \mid S = 1\}$  and  $\zeta_0 \equiv E\{\Psi_{\mathcal{C}}(\mathbf{W}, \boldsymbol{\beta}) \mid S = 0\}$ . By the central limit theorem, Slutsky’s theorem and Assumption 1, we have

$$n^{1/2} \left\{ n^{-1} \sum_{i \in \mathcal{V}} \Psi_n(\mathbf{W}_i, \boldsymbol{\beta}) - \zeta_{\mathcal{V}} \right\} \rightarrow \mathbf{N}(\mathbf{0}, \mathbf{B}_{\mathcal{V}}) \quad (n, N \rightarrow \infty). \tag{S.7}$$

Analogously, we can obtain that, as  $n, N \rightarrow \infty$ ,

$$n^{1/2} \left\{ n^{-1} \sum_{i \in \mathcal{U}} \Psi_n(\mathbf{W}_i, \boldsymbol{\beta}) - (\tau - \delta) \zeta_{\mathcal{U}} \right\} \rightarrow \mathbf{N}\{\mathbf{0}, \delta(\tau - \delta) \mathbf{B}_{\mathcal{U}}\}, \tag{S.8}$$

$$n^{1/2} \left\{ n^{-1} \sum_{i \in \mathcal{C}} \Psi_n(\mathbf{W}_i, \boldsymbol{\beta}) - (1 - \tau) \zeta_0 \right\} \rightarrow \mathbf{N}\{\mathbf{0}, \delta(1 - \tau) \mathbf{B}_0\}. \tag{S.9}$$

Considering the facts that  $\{\mathbf{W}_i : i \in \mathcal{V}\}$ ,  $\{\mathbf{W}_i : i \in \mathcal{U}\}$  and  $\{\mathbf{W}_i : i \in \mathcal{C}\}$  are mutually

independent, and that

$$\zeta_v + (\tau - \delta)\zeta_u + (1 - \tau)\zeta_0 = \Phi(\beta) = n^{-1}\sum_{i=1}^N E\{\Psi_n(\mathbf{W}_i, \beta)\} = \mathbf{0}$$

due to Proposition 1 and the case-control sampling, Lemma 1 and the convergences in (S.7)–(S.9) imply that, as  $n, N \rightarrow \infty$ ,

$$\begin{aligned} n^{-1/2}\sum_{i=1}^N \Psi_n(\mathbf{W}_i, \beta) &\equiv n^{-1/2}\{\sum_{i \in \mathcal{V}} \Psi_n(\mathbf{W}_i, \beta) + \sum_{i \in \mathcal{U}} \Psi_n(\mathbf{W}_i, \beta) + \sum_{i \in \mathcal{C}} \Psi_n(\mathbf{W}_i, \beta)\} \\ &\rightarrow \mathbf{N}(\mathbf{0}, \mathbf{B}). \end{aligned} \quad (\text{S.10})$$

The case-control sampling and Proposition 1 guarantee that

$$\Phi(\beta) = n^{-1}\sum_{i=1}^N E\{\Psi_n(\mathbf{W}_i, \beta)\} = \mathbf{0}. \quad (\text{S.11})$$

Then, considering the condition (S.1) and the fact that  $\beta$  is the unique solution to  $\Phi(\mathbf{b}) = \mathbf{0}$  from Assumption 1, Theorem 5.9 of Van der Vaart (2000) gives

$$\widehat{\beta} \rightarrow \beta \quad (n, N \rightarrow \infty) \quad (\text{S.12})$$

in probability. By Taylor's expansion and (S.6), we have

$$\begin{aligned} \mathbf{0} = n^{-1}\sum_{i=1}^N \Psi_n(\mathbf{W}_i, \widehat{\beta}) &= n^{-1}\sum_{i=1}^N \Psi_n(\mathbf{W}_i, \beta) + n^{-1}\sum_{i=1}^N \Psi'_n(\mathbf{W}_i, \beta)(\widehat{\beta} - \beta) + \mathbf{r}_n \\ &= n^{-1}\sum_{i=1}^N \Psi_n(\mathbf{W}_i, \beta) + \mathbf{A}(\widehat{\beta} - \beta) + \mathbf{u}_n + \mathbf{r}_n. \end{aligned} \quad (\text{S.13})$$

In (S.13), the term  $\mathbf{u}_n \equiv \{n^{-1}\sum_{i=1}^N \Psi'_n(\mathbf{W}_i, \beta) - \mathbf{A}\}(\widehat{\beta} - \beta)$ , while  $\mathbf{r}_n$  is a  $2p$ -dimensional vector, whose  $j$ th component is  $r_{n,j} \equiv n^{-1}(\widehat{\beta} - \beta)^T \Omega'_{n,j}(\bar{\beta})(\widehat{\beta} - \beta)$  with  $\bar{\beta} \equiv \beta + \mathbf{A}(\widehat{\beta} - \beta)$  for some diagonal matrix  $\mathbf{A} \equiv \text{diag}(\lambda_1, \dots, \lambda_{2p})$  and some  $\lambda_j \in (0, 1)$  ( $j = 1, \dots, 2p$ ). The convergence in (S.6) and Assumption 1 give

$$\|\mathbf{A}^{-1}\mathbf{u}_n\| = o_p(\|\widehat{\beta} - \beta\|). \quad (\text{S.14})$$

Further, by the condition (S.2) of Assumption 1 and the convergence (S.12), we know that

$$\begin{aligned} |r_{n,j}| = n^{-1}|(\widehat{\beta} - \beta)^T \Omega'_{n,j}(\bar{\beta})(\widehat{\beta} - \beta)| &\leq n^{-1}\|\widehat{\beta} - \beta\|^2 \lambda_{\max}\{\Omega'_{n,j}(\bar{\beta})\} \\ &= o_p(\|\widehat{\beta} - \beta\|) \quad (j = 1, \dots, 2p), \end{aligned}$$

which implies that

$$\|\mathbf{A}^{-1}\mathbf{r}_n\| = o_p(\|\widehat{\boldsymbol{\beta}} - \boldsymbol{\beta}\|). \quad (\text{S.15})$$

Considering the fact that  $n^{-1}\|\sum_{i=1}^N \boldsymbol{\Psi}_n(\mathbf{W}_i, \boldsymbol{\beta})\| = O_p(n^{-1/2})$  from (S.10), (S.10) through (S.15) conclude that  $\|\widehat{\boldsymbol{\beta}} - \boldsymbol{\beta}\| = O_p(n^{-1/2})$  and that

$$\begin{aligned} n^{1/2}(\widehat{\boldsymbol{\beta}} - \boldsymbol{\beta}) &= -\mathbf{A}^{-1}\{n^{-1/2}\sum_{i=1}^N \boldsymbol{\Psi}_n(\mathbf{W}_i, \boldsymbol{\beta}) + n^{1/2}(\mathbf{u}_n + \mathbf{r}_n)\} \\ &= -n^{-1/2}\mathbf{A}^{-1}\sum_{i=1}^N \boldsymbol{\Psi}_n(\mathbf{W}_i, \boldsymbol{\beta}) + o_p(1) \rightarrow \mathbf{N}\{\mathbf{0}, \mathbf{A}^{-1}\mathbf{B}(\mathbf{A}^{-1})^T\} \end{aligned}$$

in distribution as  $n, N \rightarrow \infty$ .

## Web Appendix F: Proof of Corollary 1

We have

$$\begin{aligned} N^{-1}\sum_{i=1}^N \boldsymbol{\Psi}_1(\mathbf{W}_i, \boldsymbol{\beta}) &\equiv N^{-1}\sum_{i \in \mathcal{V} \cup \mathcal{U}} \boldsymbol{\Psi}_1(\mathbf{W}_i, \boldsymbol{\beta}) + N^{-1}\sum_{i \in \mathcal{C}} \boldsymbol{\Psi}_1(\mathbf{W}_i, \boldsymbol{\beta}) \\ &= \tau E\{\boldsymbol{\Psi}_1(\mathbf{W}, \boldsymbol{\beta}) \mid S = 1\} + (1 - \tau)E\{\boldsymbol{\Psi}_1(\mathbf{W}, \boldsymbol{\beta}) \mid S = 0\} + O_p(N^{-1/2}) \\ &= o_p(n^{-1/2}). \end{aligned} \quad (\text{S.16})$$

In the above, the second step is due to the case-control sampling and the central limit theorem, while the third step holds by the facts that  $\delta \equiv \lim_{n, N \rightarrow \infty} n/N = 0$  and that

$$\begin{aligned} &\tau E\{\boldsymbol{\Psi}_1(\mathbf{W}, \boldsymbol{\beta}) \mid S = 1\} + (1 - \tau)E\{\boldsymbol{\Psi}_1(\mathbf{W}, \boldsymbol{\beta}) \mid S = 0\} \\ &\equiv \tau E\{h(\boldsymbol{\alpha}^T \mathbf{X}) \mathbf{X} \bar{h}(\boldsymbol{\theta}^T \mathbf{X}) \mid S = 1\} - (1 - \tau)E\{\mathbf{X} h(\boldsymbol{\theta}^T \mathbf{X}) \mid S = 0\} \\ &= N^{-1}\sum_{i=1}^N E\{S_i g(\mathbf{X}_i) \mathbf{X}_i \bar{h}(\boldsymbol{\theta}^T \mathbf{X}_i) - (1 - S_i) \mathbf{X}_i h(\boldsymbol{\theta}^T \mathbf{X}_i)\} = \mathbf{0} \end{aligned}$$

from (13) in Proposition 1. The result (S.16), combined with (17) and the fact that  $R_i S_i = I(i \leq n)$  ( $i = 1, \dots, N$ ), implies (19). Then the asymptotic normality can be shown by setting  $\delta \equiv 0$  in (18).

### Web Appendix G: Proof of the Equation (22)

Since  $E(D | \mathbf{X}, S = 1) = h(\boldsymbol{\alpha}^T \mathbf{X})$ , we have

$$E\{\boldsymbol{\Psi}_2(\mathbf{W}, \boldsymbol{\beta}) | \mathbf{X}, S = 1\} \equiv E\{[h(\boldsymbol{\alpha}^T \mathbf{X}) - D]\mathbf{X}\bar{h}(\boldsymbol{\theta}^T \mathbf{X}) | \mathbf{X}, S = 1\} = \mathbf{0},$$

which indicates

$$E\{\boldsymbol{\varphi}(\mathbf{W}, \boldsymbol{\beta}) | \mathbf{X}, S = 1\} \equiv E[\mathbf{A}^{-1}\{\mathbf{0}_p^T, \boldsymbol{\Psi}_2^T(\mathbf{W}, \boldsymbol{\beta})\}^T | \mathbf{X}, S = 1] = \mathbf{0}. \quad (\text{S.17})$$

According to Theorem 4.5 of Tsiatis (2007), the tangent space corresponding to the semi-parametric model  $\mathcal{M}$ , given in (20), is

$$\mathcal{T} \equiv \{\mathbf{g}(D, S, \mathbf{X}) \in \mathbb{R}^{2p} : E\{\mathbf{g}(D, S, \mathbf{X}) | \mathbf{X}, S = 1\} = \mathbf{0}, \text{cov}\{\mathbf{g}(D, S, \mathbf{X})\} < \infty\},$$

and the projection of the influence function  $\boldsymbol{\varphi}(\mathbf{W}, \boldsymbol{\beta})$  of  $\hat{\boldsymbol{\beta}}$  onto  $\mathcal{T}$  is

$$\Pi\{\boldsymbol{\varphi}(\mathbf{W}, \boldsymbol{\beta}) | \mathcal{T}\} = \boldsymbol{\varphi}(\mathbf{W}, \boldsymbol{\beta}) - E\{\boldsymbol{\varphi}(\mathbf{W}, \boldsymbol{\beta}) | \mathbf{X}, S = 1\} = \boldsymbol{\varphi}(\mathbf{W}, \boldsymbol{\beta})$$

due to (S.17). Then, using Theorem 4.3 of Tsiatis (2007), we know

$$\boldsymbol{\varphi}_{\text{EFF}}(\mathbf{W}, \boldsymbol{\beta}) \equiv \Pi\{\boldsymbol{\varphi}(\mathbf{W}, \boldsymbol{\beta}) | \mathcal{T}\} = \boldsymbol{\varphi}(\mathbf{W}, \boldsymbol{\beta}) \equiv \mathbf{A}^{-1}\{\mathbf{0}_p^T, \boldsymbol{\Psi}_2^T(\mathbf{W}, \boldsymbol{\beta})\}.$$

### Web Appendix H: Supplements for the Numerical Studies in Sections 4 and 5

[Table 1 about here.]

[Table 2 about here.]

[Table 3 about here.]

[Table 4 about here.]

### References

- Tsiatis, A. (2007). *Semiparametric Theory and Missing Data*. Springer Science & Business Media.
- Van der Vaart, A. W. (2000). *Asymptotic Statistics*, volume 3. Cambridge University Press.

*Received October 2007. Revised February 2008. Accepted March 2008.*

**Table S1**

Proportions  $E(D | S = 1)$  of true cases in the candidate case pool under the simulation settings (23) and (24) used in Section 4. Here  $p$  is the covariate dimension while (a)–(e) are forms of the function  $\rho(\mathbf{x})$  in (23)–(24).

| $p$ | Model (23) |      |      |      |      | Model (24) |      |      |      |      |
|-----|------------|------|------|------|------|------------|------|------|------|------|
|     | (a)        | (b)  | (c)  | (d)  | (e)  | (a)        | (b)  | (c)  | (d)  | (e)  |
| 7   | 0.39       | 0.55 | 0.45 | 0.61 | 0.43 | 0.65       | 0.56 | 0.61 | 0.50 | 0.65 |
| 13  | 0.33       | 0.57 | 0.47 | 0.62 | 0.49 | 0.71       | 0.54 | 0.61 | 0.49 | 0.58 |



**Table S2**

Results of the simulations in Section 4: biases, measured by the criterion (25), of the estimators for  $\theta_{-1}$  from the validation-only estimating equation (VEE), from the naive estimating equation (NEE), from the parametrically imputed estimating equation (PIEE) and from the unbiasedly imputed estimating equation (UIEE) under the models (23) and (24) with the covariate dimension  $p = 7$ . Here  $n$  is the validation set size,  $N$  is the whole sample size and  $\rho(\mathbf{x})$  is the function in (23)–(24).

| Model | $n$ | $\rho(\mathbf{x})$ | $N = 2,500$ |      |      |             | $N = 5,000$ |      |      |             | $N = 25,000$ |      |      |             |
|-------|-----|--------------------|-------------|------|------|-------------|-------------|------|------|-------------|--------------|------|------|-------------|
|       |     |                    | VEE         | NEE  | PIEE | UIEE        | VEE         | NEE  | PIEE | UIEE        | VEE          | NEE  | PIEE | UIEE        |
| (23)  | 100 | (a)                | 0.01        | 0.41 | 0.01 | <b>0.01</b> | 0.01        | 0.40 | 0.01 | <b>0.01</b> | 0.01         | 0.40 | 0.01 | <b>0.01</b> |
|       |     | (b)                | 0.01        | 0.22 | 0.07 | <b>0.01</b> | 0.00        | 0.22 | 0.07 | <b>0.01</b> | 0.01         | 0.22 | 0.07 | <b>0.01</b> |
|       |     | (c)                | 0.01        | 0.34 | 0.07 | <b>0.00</b> | 0.00        | 0.34 | 0.07 | <b>0.01</b> | 0.01         | 0.34 | 0.07 | <b>0.00</b> |
|       |     | (d)                | 0.01        | 0.21 | 0.05 | <b>0.01</b> | 0.01        | 0.21 | 0.06 | <b>0.01</b> | 0.00         | 0.21 | 0.06 | <b>0.00</b> |
|       |     | (e)                | 0.01        | 0.33 | 0.09 | <b>0.01</b> | 0.01        | 0.32 | 0.09 | <b>0.01</b> | 0.01         | 0.32 | 0.09 | <b>0.00</b> |
|       | 200 | (a)                | 0.01        | 0.41 | 0.00 | <b>0.00</b> | 0.01        | 0.40 | 0.00 | <b>0.00</b> | 0.01         | 0.40 | 0.00 | <b>0.00</b> |
|       |     | (b)                | 0.01        | 0.22 | 0.06 | <b>0.00</b> | 0.01        | 0.22 | 0.07 | <b>0.00</b> | 0.01         | 0.22 | 0.07 | <b>0.00</b> |
|       |     | (c)                | 0.01        | 0.34 | 0.06 | <b>0.00</b> | 0.00        | 0.34 | 0.07 | <b>0.00</b> | 0.00         | 0.34 | 0.08 | <b>0.00</b> |
|       |     | (d)                | 0.01        | 0.21 | 0.05 | <b>0.00</b> | 0.01        | 0.21 | 0.06 | <b>0.00</b> | 0.00         | 0.21 | 0.06 | <b>0.00</b> |
|       |     | (e)                | 0.01        | 0.33 | 0.08 | <b>0.00</b> | 0.00        | 0.32 | 0.09 | <b>0.00</b> | 0.00         | 0.32 | 0.09 | <b>0.00</b> |
|       | 400 | (a)                | 0.01        | 0.41 | 0.00 | <b>0.00</b> | 0.01        | 0.40 | 0.00 | <b>0.00</b> | 0.00         | 0.40 | 0.00 | <b>0.00</b> |
|       |     | (b)                | 0.01        | 0.22 | 0.05 | <b>0.00</b> | 0.00        | 0.22 | 0.06 | <b>0.00</b> | 0.00         | 0.22 | 0.07 | <b>0.00</b> |
|       |     | (c)                | 0.01        | 0.34 | 0.05 | <b>0.00</b> | 0.00        | 0.34 | 0.06 | <b>0.00</b> | 0.00         | 0.34 | 0.08 | <b>0.00</b> |
|       |     | (d)                | 0.01        | 0.21 | 0.04 | <b>0.00</b> | 0.00        | 0.21 | 0.05 | <b>0.00</b> | 0.00         | 0.21 | 0.06 | <b>0.00</b> |
|       |     | (e)                | 0.01        | 0.33 | 0.06 | <b>0.00</b> | 0.01        | 0.32 | 0.08 | <b>0.00</b> | 0.00         | 0.32 | 0.09 | <b>0.00</b> |
| (24)  | 100 | (a)                | 0.15        | 0.47 | 0.02 | <b>0.02</b> | 0.18        | 0.47 | 0.02 | <b>0.02</b> | 0.22         | 0.47 | 0.02 | <b>0.02</b> |
|       |     | (b)                | 0.15        | 0.43 | 0.15 | <b>0.02</b> | 0.19        | 0.43 | 0.15 | <b>0.02</b> | 0.22         | 0.43 | 0.16 | <b>0.02</b> |
|       |     | (c)                | 0.17        | 0.48 | 0.10 | <b>0.02</b> | 0.20        | 0.49 | 0.11 | <b>0.02</b> | 0.24         | 0.49 | 0.11 | <b>0.01</b> |
|       |     | (d)                | 0.20        | 0.56 | 0.17 | <b>0.02</b> | 0.24        | 0.56 | 0.18 | <b>0.02</b> | 0.29         | 0.56 | 0.18 | <b>0.02</b> |
|       |     | (e)                | 0.13        | 0.40 | 0.10 | <b>0.02</b> | 0.16        | 0.40 | 0.11 | <b>0.02</b> | 0.20         | 0.40 | 0.11 | <b>0.02</b> |
|       | 200 | (a)                | 0.11        | 0.47 | 0.02 | <b>0.02</b> | 0.16        | 0.47 | 0.01 | <b>0.01</b> | 0.21         | 0.47 | 0.01 | <b>0.01</b> |
|       |     | (b)                | 0.12        | 0.43 | 0.14 | <b>0.02</b> | 0.16        | 0.43 | 0.15 | <b>0.01</b> | 0.21         | 0.43 | 0.16 | <b>0.01</b> |
|       |     | (c)                | 0.13        | 0.48 | 0.09 | <b>0.01</b> | 0.18        | 0.49 | 0.11 | <b>0.01</b> | 0.23         | 0.49 | 0.11 | <b>0.01</b> |
|       |     | (d)                | 0.16        | 0.56 | 0.16 | <b>0.02</b> | 0.21        | 0.56 | 0.18 | <b>0.01</b> | 0.27         | 0.56 | 0.19 | <b>0.01</b> |
|       |     | (e)                | 0.10        | 0.40 | 0.09 | <b>0.01</b> | 0.14        | 0.40 | 0.10 | <b>0.01</b> | 0.19         | 0.40 | 0.11 | <b>0.01</b> |
|       | 400 | (a)                | 0.07        | 0.47 | 0.01 | <b>0.01</b> | 0.12        | 0.47 | 0.01 | <b>0.01</b> | 0.19         | 0.47 | 0.01 | <b>0.01</b> |
|       |     | (b)                | 0.08        | 0.43 | 0.11 | <b>0.01</b> | 0.13        | 0.43 | 0.14 | <b>0.01</b> | 0.20         | 0.43 | 0.16 | <b>0.01</b> |
|       |     | (c)                | 0.08        | 0.48 | 0.07 | <b>0.01</b> | 0.14        | 0.49 | 0.10 | <b>0.01</b> | 0.22         | 0.49 | 0.11 | <b>0.01</b> |
|       |     | (d)                | 0.10        | 0.56 | 0.13 | <b>0.02</b> | 0.16        | 0.56 | 0.16 | <b>0.01</b> | 0.25         | 0.56 | 0.19 | <b>0.01</b> |
|       |     | (e)                | 0.06        | 0.40 | 0.07 | <b>0.01</b> | 0.11        | 0.40 | 0.09 | <b>0.01</b> | 0.17         | 0.40 | 0.11 | <b>0.01</b> |

**Table S3**

Results of the simulations in Section 4: mean squared error ratios of the estimators for  $\theta_{-1}$  from the validation-only estimating equation to those from the naive estimating equation (NEE), from the parametrically imputed estimating equation (PIEE) and from the unbiasedly imputed estimating equation (UIEE) under the models (23) and (24) with the covariate dimension  $p = 7$ . Here  $n$  is the validation set size,  $N$  is the whole sample size and  $\rho(\mathbf{x})$  is the function in (23)–(24).

| Model | $n$ | $\rho(\mathbf{x})$ | $N = 2,500$ |      |             | $N = 5,000$ |      |             | $N = 25,000$ |       |              |
|-------|-----|--------------------|-------------|------|-------------|-------------|------|-------------|--------------|-------|--------------|
|       |     |                    | NEE         | PIEE | UIEE        | NEE         | PIEE | UIEE        | NEE          | PIEE  | UIEE         |
| (23)  | 100 | (a)                | 0.22        | 3.28 | <b>3.10</b> | 0.21        | 3.71 | <b>3.49</b> | 0.22         | 4.21  | <b>3.97</b>  |
|       |     | (b)                | 0.43        | 1.59 | <b>2.45</b> | 0.43        | 1.68 | <b>2.86</b> | 0.42         | 1.69  | <b>3.19</b>  |
|       |     | (c)                | 0.24        | 1.68 | <b>2.66</b> | 0.24        | 1.77 | <b>3.03</b> | 0.21         | 1.60  | <b>3.21</b>  |
|       |     | (d)                | 0.46        | 2.10 | <b>3.23</b> | 0.45        | 2.23 | <b>3.86</b> | 0.41         | 2.23  | <b>4.37</b>  |
|       |     | (e)                | 0.26        | 1.32 | <b>2.25</b> | 0.25        | 1.30 | <b>2.45</b> | 0.23         | 1.21  | <b>2.50</b>  |
|       | 200 | (a)                | 0.11        | 2.57 | <b>2.47</b> | 0.10        | 3.25 | <b>3.10</b> | 0.10         | 4.33  | <b>4.14</b>  |
|       |     | (b)                | 0.23        | 1.22 | <b>2.05</b> | 0.23        | 1.23 | <b>2.60</b> | 0.21         | 1.19  | <b>3.34</b>  |
|       |     | (c)                | 0.12        | 1.26 | <b>2.17</b> | 0.12        | 1.29 | <b>2.76</b> | 0.11         | 1.18  | <b>3.39</b>  |
|       |     | (d)                | 0.24        | 1.50 | <b>2.45</b> | 0.23        | 1.56 | <b>3.27</b> | 0.21         | 1.52  | <b>4.70</b>  |
|       |     | (e)                | 0.14        | 1.05 | <b>1.97</b> | 0.13        | 0.96 | <b>2.30</b> | 0.12         | 0.85  | <b>2.62</b>  |
|       | 400 | (a)                | 0.06        | 1.73 | <b>1.70</b> | 0.05        | 2.46 | <b>2.40</b> | 0.05         | 4.22  | <b>4.06</b>  |
|       |     | (b)                | 0.13        | 1.02 | <b>1.55</b> | 0.12        | 0.91 | <b>2.14</b> | 0.11         | 0.75  | <b>3.32</b>  |
|       |     | (c)                | 0.07        | 1.04 | <b>1.60</b> | 0.06        | 0.96 | <b>2.21</b> | 0.06         | 0.79  | <b>3.40</b>  |
|       |     | (d)                | 0.13        | 1.10 | <b>1.58</b> | 0.12        | 1.05 | <b>2.27</b> | 0.11         | 0.93  | <b>4.29</b>  |
|       |     | (e)                | 0.08        | 0.93 | <b>1.57</b> | 0.07        | 0.74 | <b>1.99</b> | 0.06         | 0.59  | <b>2.62</b>  |
| (24)  | 100 | (a)                | 0.21        | 2.88 | <b>2.82</b> | 0.24        | 3.85 | <b>3.78</b> | 0.28         | 5.38  | <b>5.19</b>  |
|       |     | (b)                | 0.27        | 1.24 | <b>2.58</b> | 0.31        | 1.38 | <b>3.30</b> | 0.36         | 1.60  | <b>4.45</b>  |
|       |     | (c)                | 0.23        | 1.83 | <b>3.14</b> | 0.26        | 2.15 | <b>4.29</b> | 0.32         | 2.69  | <b>5.81</b>  |
|       |     | (d)                | 0.22        | 1.29 | <b>3.04</b> | 0.27        | 1.48 | <b>4.19</b> | 0.33         | 1.82  | <b>5.39</b>  |
|       |     | (e)                | 0.25        | 1.52 | <b>2.47</b> | 0.29        | 1.72 | <b>3.19</b> | 0.34         | 2.06  | <b>4.33</b>  |
|       | 200 | (a)                | 0.12        | 2.84 | <b>2.78</b> | 0.16        | 4.85 | <b>4.71</b> | 0.23         | 9.60  | <b>9.34</b>  |
|       |     | (b)                | 0.16        | 1.02 | <b>2.66</b> | 0.21        | 1.20 | <b>4.29</b> | 0.30         | 1.62  | <b>8.19</b>  |
|       |     | (c)                | 0.14        | 1.67 | <b>3.20</b> | 0.18        | 2.14 | <b>5.55</b> | 0.27         | 3.15  | <b>10.81</b> |
|       |     | (d)                | 0.14        | 1.07 | <b>3.18</b> | 0.19        | 1.32 | <b>5.57</b> | 0.28         | 1.84  | <b>10.14</b> |
|       |     | (e)                | 0.15        | 1.38 | <b>2.48</b> | 0.19        | 1.66 | <b>3.99</b> | 0.27         | 2.31  | <b>7.40</b>  |
|       | 400 | (a)                | 0.06        | 2.00 | <b>1.99</b> | 0.10        | 4.61 | <b>4.53</b> | 0.19         | 14.57 | <b>14.16</b> |
|       |     | (b)                | 0.08        | 0.82 | <b>1.98</b> | 0.13        | 0.97 | <b>4.32</b> | 0.24         | 1.50  | <b>12.71</b> |
|       |     | (c)                | 0.07        | 1.31 | <b>2.23</b> | 0.11        | 1.84 | <b>5.45</b> | 0.22         | 3.15  | <b>16.82</b> |
|       |     | (d)                | 0.07        | 0.85 | <b>2.16</b> | 0.11        | 1.06 | <b>5.23</b> | 0.23         | 1.72  | <b>17.50</b> |
|       |     | (e)                | 0.08        | 1.10 | <b>1.80</b> | 0.11        | 1.38 | <b>3.81</b> | 0.21         | 2.24  | <b>11.10</b> |

**Table S4**

*Names, descriptions and summary statistics of the covariates considered in the data analysis of Section 5. Here “SD” stands for “standard deviation”.*

| <b>Variable name</b> | <b>Description</b>                                                                                             | <b>Mean</b> | <b>SD</b> |
|----------------------|----------------------------------------------------------------------------------------------------------------|-------------|-----------|
| urineoutput          | Urine output (ml/kg/hr)                                                                                        | 1532.4      | 1384.1    |
| sysbp_min            | Minimum systolic blood pressure (mmHg)                                                                         | 82.0        | 17.3      |
| spo2_mean            | Mean fraction of oxygen-saturated hemoglobin relative to total hemoglobin (unsaturated+saturated) in the blood | 96.5        | 3.1       |
| sodium_max           | Maximum sodium concentration in blood (mmol/L)                                                                 | 140.7       | 6.48      |
| metastatic_cancer    | Having metastatic cancer (1) or not (0)                                                                        | 0.1         | 0.3       |
| lactate_min          | Minimum lactate concentration in blood (mmol/L)                                                                | 2.0         | 1.6       |
| is_male              | Being male (1) or not (0)                                                                                      | 0.6         | 0.5       |
| creatinine_min       | Minimum creatinine concentration in blood (mmol/L)                                                             | 1.6         | 1.3       |
| bun_mean             | Mean level of blood urea nitrogen (mmol/L)                                                                     | 37.3        | 26.5      |
| aniongap_max         | Maximum anion gap (mmol/L)                                                                                     | 18.3        | 5.6       |
| age                  | Age (year)                                                                                                     | 68.5        | 16.9      |
